# Supplementary material
Source: PubMed Central journal article supplement (PMC6437525)
Supplement: AAC.01904-18-s0001.pdf [file AAC.01904-18-s0001.pdf]

**S1 Table:** Intra-group statistics for cecal-associated total CFU titers.

| Treatment (no. of hamsters)             | Mean (Log <sub>10</sub> ) | Std. Deviation of Mean | Std. Error of Mean | 95% CI of Mean | Coefficient of Variation | Skewness |
|-----------------------------------------|---------------------------|------------------------|--------------------|----------------|--------------------------|----------|
| OG716                                   |                           |                        |                    |                |                          |          |
| 6 mg/kg q8h for 5 days ( <i>n</i> =6)   | 6.13                      | ± 1.14                 | ± 0.47             | 4.9 – 7.3      | 18.6%                    | -0.7     |
| 18 mg/kg q8h for 5 days ( <i>n</i> =6)  | 4.27                      | ± 1.89                 | ± 0.77             | 2.3 – 6.3      | 44.2%                    | 0.3      |
| 60 mg/kg q8h for 5 days ( <i>n</i> =6)  | 3.88                      | ± 2.29                 | ± 0.94             | 1.5 – 6.3      | 59.1%                    | 1.0      |
| 105 mg/kg q8h for 5 days ( <i>n</i> =6) | <2.4                      | -                      | -                  | -              | -                        | -        |
| 180 mg/kg q8h for 5 days ( <i>n</i> =6) | 2.51                      | ± 0.29                 | ± 0.12             | 2.2 – 2.8      | 11.4%                    | 2.5      |
| OG718                                   |                           |                        |                    |                |                          |          |
| 18 mg/kg q8h for 5 days ( <i>n</i> =6)  | 5.47                      | ± 0.39                 | ± 0.16             | 5.1 – 5.9      | 7.1%                     | -0.4     |
| 60 mg/kg q8h for 5 days ( <i>n</i> =6)  | 5.37                      | ± 2.31                 | ± 0.94             | 2.9 – 7.8      | 43.1%                    | -0.9     |
| 180 mg/kg q8h for 5 days ( <i>n</i> =6) | 3.18                      | ± 1.2                  | ± 0.49             | 1.9 – 4.4      | 37.9%                    | 1.0      |
| Vancomycin                              |                           |                        |                    |                |                          |          |
| 20 mg/kg q24h for 5 days ( <i>n</i> =6) | 5.15                      | ± 1.68                 | ± 0.68             | 3.4 – 6.9      | 32.5%                    | -0.8     |
| Vehicle Treated Control                 |                           |                        |                    |                |                          |          |
| Vehicle q8h for 5 days ( <i>n</i> =6)   | 6.66                      | ± 1.06                 | ± 0.44             | 5.5 – 7.8      | 16.0%                    | 0.04     |

**S2 Table:** Intra-group statistics for cecal-associated toxin A titers.

| Treatment (no. of hamsters)             | Mean  | Std. Deviation of Mean | Std. Error of Mean | 95% CI of Mean | Coefficient of Variation | Skewness |
|-----------------------------------------|-------|------------------------|--------------------|----------------|--------------------------|----------|
| OG716                                   |       |                        |                    |                |                          |          |
| 6 mg/kg q8h for 5 days ( <i>n</i> =6)   | 578.5 | ± 425.7                | ± 173.8            | 131.8 – 1025   | 73.6%                    | 0.6      |
| 18 mg/kg q8h for 5 days ( <i>n</i> =6)  | 266.2 | ± 398                  | ± 162.5            | -151.4 – 683.9 | 149.5%                   | 1.4      |
| 60 mg/kg q8h for 5 days ( <i>n</i> =6)  | 74.25 | ± 161.1                | ± 65.8             | -94.8 – 243.3  | 217%                     | 2.4      |
| 105 mg/kg q8h for 5 days ( <i>n</i> =6) | <0.8  | -                      | -                  | -              | -                        | -        |
| 180 mg/kg q8h for 5 days ( <i>n</i> =6) | 7.35  | ± 16                   | ± 6.6              | -9.5 – 24.2    | 218.3%                   | 2.5      |
| OG718                                   |       |                        |                    |                |                          |          |
| 18 mg/kg q8h for 5 days ( <i>n</i> =6)  | 215.6 | ± 179.2                | ± 73.2             | 27.6 – 403.6   | 83.1%                    | 0.8      |
| 60 mg/kg q8h for 5 days ( <i>n</i> =6)  | 165.6 | ± 204.6                | ± 83.5             | -49.1 – 380.3  | 123.6%                   | 1.1      |
| 180 mg/kg q8h for 5 days ( <i>n</i> =6) | 47.6  | ± 88.7                 | ± 36.2             | -45.5 – 140.7  | 186.2%                   | 2.1      |
| Vancomycin                              |       |                        |                    |                |                          |          |
| 20 mg/kg q24h for 5 days ( <i>n</i> =6) | 292.7 | ± 576.8                | ± 235.5            | -312.6 – 898   | 197.1%                   | 2.4      |
| Vehicle Treated Control                 |       |                        |                    |                |                          |          |
| Vehicle q8h for 5 days ( <i>n</i> =6)   | 2857  | ± 1853                 | ± 756.4            | 912.9 – 4801   | 64.8%                    | 1.0      |

**S3 Table:** Intra-group statistics for cecal-associated toxin B titers.

| Treatment (no. of hamsters)             | Mean  | Std. Deviation of Mean | Std. Error of Mean | 95% CI of Mean | Coefficient of Variation | Skewness |
|-----------------------------------------|-------|------------------------|--------------------|----------------|--------------------------|----------|
| OG716                                   |       |                        |                    |                |                          |          |
| 6 mg/kg q8h for 5 days ( <i>n</i> =6)   | 462.8 | ± 310.9                | ± 126.9            | 136.5 – 789    | 67.2%                    | 0.1      |
| 18 mg/kg q8h for 5 days ( <i>n</i> =6)  | 239.1 | ± 299.2                | ± 122.2            | -74.9 – 553.1  | 125.1%                   | 0.9      |
| 60 mg/kg q8h for 5 days ( <i>n</i> =6)  | 57.9  | ± 129.5                | ± 52.9             | -94.8 – 243.3  | 223.9%                   | 2.4      |
| 105 mg/kg q8h for 5 days ( <i>n</i> =6) | <0.8  | -                      | -                  | -              | -                        | -        |
| 180 mg/kg q8h for 5 days ( <i>n</i> =6) | 5.6   | ± 5.1                  | ± 2.1              | 0.2 – 10.9     | 91.8%                    | 0.1      |
| OG718                                   |       |                        |                    |                |                          |          |
| 18 mg/kg q8h for 5 days ( <i>n</i> =6)  | 242.3 | ± 186.4                | ± 76.1             | 46.7 – 437.8   | 76.9%                    | 0.2      |
| 60 mg/kg q8h for 5 days ( <i>n</i> =6)  | 272.3 | ± 291                  | ± 118.8            | -33.1 – 577.7  | 107.0%                   | 0.5      |
| 180 mg/kg q8h for 5 days ( <i>n</i> =6) | 108.7 | ± 167.2                | ± 68.3             | -66.7 – 284.2  | 153.8%                   | 1.0      |
| Vancomycin                              |       |                        |                    |                |                          |          |
| 20 mg/kg q24h for 5 days ( <i>n</i> =6) | 121.1 | ± 134.9                | ± 55.1             | -20.4 – 262.6  | 111.4%                   | 0.2      |
| Vehicle Treated Control                 |       |                        |                    |                |                          |          |
| Vehicle q8h for 5 days ( <i>n</i> =6)   | 1853  | ± 1625                 | ± 663.3            | 147.8 – 3558   | 87.7%                    | 0.9      |
